# Supplementary material
Source: publisher figshare collection journal article supplement (https://frontiersin.figshare.com/ndownloader/files/14088254)
Supplement: Supplementary file [file 14088254]

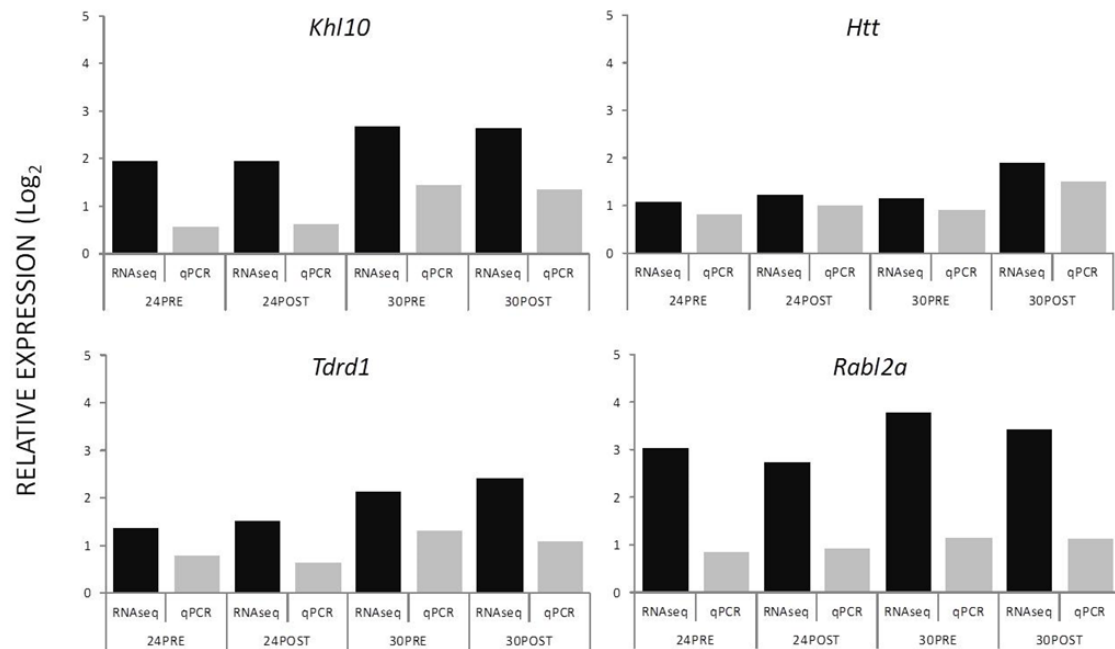

**Supplementary Figure 2.** RNA-seq and qPCR log<sub>2</sub> transformed expression for transcripts involved in reproductive process.
